# Supplementary material for: Deep Care: A Qualitative Analysis of Black Community Midwifery
Source: Research Square preprint supplement (doi:10.21203/rs.3.rs-8348707/v1), 2026-01-08
Supplement: Supplementary file 1 [file 0770b67b6a60ac4c50c9ad86.docx]

**ADDITIONAL FILE 1: MIDWIFE INTERVIEW GUIDE**

PI or Study Personnel:

“Hello _______. Thank you for agreeing to participate in the Black Birthing Futures study. My name is _______ and I am a ________ at the Bloomberg School of Public Health at Johns Hopkins University. I am the ______ on this project. Do you have any questions at this time?

I want to share how this interview will flow. Please confirm that you still consent to participating in this study. [Pause for confirmation. Only continue after you have received confirmation.]

I will ask you a set of questions about your experience as a Black Midwife caring for Black clients. I’d like you to share your thoughts and opinions.

At the end of the interview, I will ask a few more demographic questions which will not be audio recorded. I will write down the information. All your information will be kept in a secure place.

At the end of the interview, I will ask a few more demographic questions which will not be recorded. If you have any concerns about what you share, you can contact us at any time for up to two months, and we can delete or remove that content. We put this part of the process in motion so that you can feel comfortable knowing you can change your mind after participating. However, unfortunately, you will only have two months after the interview. Do you have any questions about any of this?

Thank you. Now, let’s begin.”

The PI will use the following probes to get the conversation started about...

1. Tell me about babies
2. Tell me about how you became a community midwife
   1. Where did you receive your education and training to become a midwife?
3. Tell me about the local community support that you receive
   1. Who are the people that support you?
   2. Which organizations support you and how?
4. Tell me about the local conditions that affect your practice
   1. What other conditions support you?
   2. What conditions hinder your work?
5. Tell me about your best experience with a Black client
   1. What made it special?
6. Tell me about your most difficult experience with a Black client?
   1. What made it challenging?
7. Tell me how you work with other providers to care for Black clients
   1. Who are your best collaborators?
   2. Who are your most difficult collaborators?
   3. Who are your missing collaborators?
8. Tell me about the culture of your practice with Black clients
   1. What special/different/unique about it?
9. Tell me about what your Black clients say about your practice.
10. Tell me about the scope of your practice
    1. What are the services that you provide?
    2. Which practices do you provide and to whom?
11. Tell me about the values and beliefs that guide your practice
    1. What does autonomy look like for you?
12. Tell me a story about how your practice impacts clients and their families
13. Tell me about your plans for your practice?
14. Besides your clinical practice, what do you do to strengthen and support Black community midwives?
15. Tell me what needs to happen in the community to strengthen and support Black community midwives
    1. What could your major or city council do to support Black community midwives
    2. What could your governor or state legislature do to support Black community midwives
    3. What could the federal government do to support Black community midwives
16. Tell me what misconceptions there are about Black community midwifes and how they could be addressed
17. Black mamas and their babies are at a higher risk for poorer health outcomes. Given your experience with this Midwife, what do you think is the role of Black midwives in addressing these poorer health outcomes or the challenges faced by Black pregnant individuals and families?
18. Tell me about your most radical vision for Black community birthing
    1. What would it take to realize that vision?
    2. Who would need to do what?
19. What else would you like me to know about this topic?

(Turn off Recorder then ask Demographic Questions after the first interview)

Age:
Gender:

Ethnicity:

Sexual Orientation:
Religion/Spiritual Community:
