# Supplementary material for: Deep Care: A Qualitative Analysis of Black Community Midwifery
Source: Research Square preprint supplement (doi:10.21203/rs.3.rs-8348707/v1), 2026-01-08
Supplement: Supplementary file 2 [file c25116b1ffc652e939690090.docx]

**ADDITIONAL FILE 2: ADULT CLIENT INTERVIEW GUIDE**

PI or Study Personnel:

“Hello _______. Thank you for agreeing to participate in this study. Just to remind you, my name is _______ and I am a ________ at the Bloomberg School of Public Health at Johns Hopkins University. I am the ______ on this project. Do you have any questions now?

I want to share how our time together will flow. Please confirm that you still consent to participating in this study. [Pause for confirmation. Only continue after you have received confirmation.]

I will ask you a set of questions about what you think and feel about the care that the Midwife provided to you. I want you to share your thoughts and opinions.

At the end of the interview, I will ask a few more demographic questions which will not be audio recorded. We will write down the information. All your information will be kept in a secure place.

We will begin our time together with a brief online survey that will take no more than 15 minutes. Once you have completed the survey, we will proceed with an interview. At the end of the interview, I will ask a few more demographic questions which will not be recorded.

If you have any concerns about what you share, you can contact us at any time for up to two months, we can delete or remove that content. We put this part of the process in motion so that you can feel comfortable knowing you can change your mind after participating. You will have two months after the interview. At the conclusion of the study, we will send the gift card of $125. Do you have any questions about any of this? We will now turn to the brief survey.”

(Conduct survey. See Appendix 27 “Validated Questionnaires_Client Key Informant”)

“Thank you for completing the survey. We’d like to proceed to the interview. Are you ready for us to proceed? The questions below refer to the care that you received from your Midwife. Thank you. Now, let us begin.”

1. What is your birth story?
2. How many times did you see the Midwife before, during, and after the delivery?
3. What can you share with us your journey and motivations for seeking care with a Black Midwife during your pregnancy?
4. What have you noticed or experienced about the care you received from your Midwife?
5. How would you compare this experience of care with any previous experiences of care you have had during previous pregnancies, if applicable?
6. In your view, how does the care that was received here differ from the care from other providers or during a previous pregnancy?
7. What approaches, if any, did your Midwife take that stood out to you in terms of supporting your overall well-being and satisfaction?
8. What was special about the Midwife’s care and how has it affected your experience?
9. What aspects of care do you think are/were most beneficial to you, and what were the benefits?
10. When you look at all the care that your Midwife provided, what is the overall result of that care on your pregnancy journey and the family as a whole?
11. If you had to talk to a friend who was considering a midwife, what would you tell them about your midwife?
12. What was the best part of having this Midwife?
13. What was the most challenging part?
14. Who else supported you during your pregnancy journey and what did they provide?
15. Midwives sometimes work with other providers such as doulas, massage therapist, mental health worker, community health workers and physicians. To your knowledge, which providers did this midwife work with and how did it affect the care you received?
16. Black mamas and their babies are at a higher risk for poorer health outcomes. Given your experience with your Midwife, what do you think is the role of Black midwives in addressing these poorer health outcomes or the challenges faced by Black pregnant individuals and families?
17. Who else has an important role to improve the outcomes for Black mamas?
18. What is your most radical vision for community-based Black birthing or Black community midwives?
    1. What needs to happen and who needs to do it?
19. What else would you like me to know about this topic?

(Stop recording then ask Demographic Questions)

Age:

Gender:

Ethnicity:

Sexual Orientation:

Religion/Spiritual Community:

Go to Media Release Script
